# Supplementary material for: The impact of cation and anion pairing in ionic salts on surface defect passivation in cesium lead bromide nanocrystals
Source: Royal Society of Chemistry journal article supplement (doi:10.1039/d0tc04257a), 2020-12-08
Supplement: d0tc04257a1.pdf [file d0tc04257a1.pdf]

## Electronic Supplementary Information

### The Impact of Cation and Anion Pairing in Ionic Salts on Surface Defect Passivation in Cesium Lead Bromide Nanocrystals

Lucy U. Yoon, Matthew R. Alpert, Hongxi Luo, Michael I. Schapowal, Eric N. Holmgren, Geoffrey M. Geise, Christopher Paolucci, Joshua J. Choi\*

Department of Chemical Engineering, University of Virginia, Charlottesville, Virginia 22904, United States

\*Email: jjc6z@virginia.edu

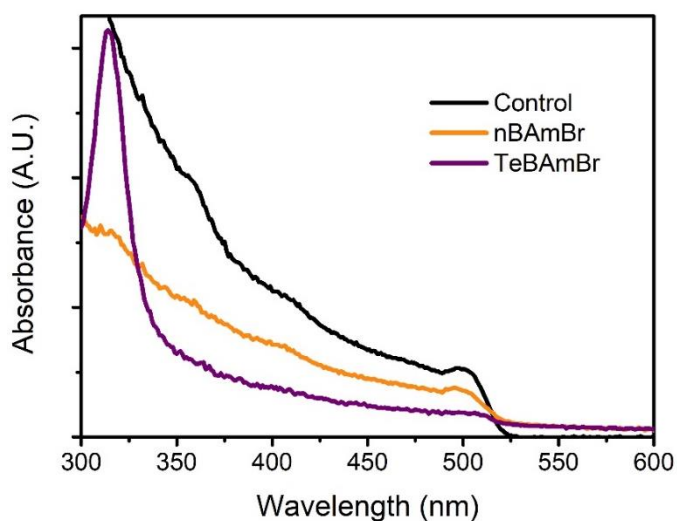

**Figure S1.** Absorbance spectra of NCs treated with 50  $\mu\text{M}$  of  $(\text{nBAm}^+)(\text{Br}^-)$  and  $(\text{TeBAm}^+)(\text{Br}^-)$ . A decrease in first excitonic peak indicates a general decrease in NC population upon ligand treatment.

**Table S1.** Averaged PL lifetime values (ns) of control versus various cation – anion pairs.

| PL lifetime (ns)<br>Untreated NCs = 1.1 | $\text{Br}^-$ | $\text{DFA}^-$ | $\text{BA}^-$ |
|-----------------------------------------|---------------|----------------|---------------|
| $\text{OLAm}^+$                         | 2.7           | 2.9            | 2.5           |
| $\text{TriBAm}^+$                       | 2.5           | 2.1            | 1.2           |
| $\text{DiBAm}^+$                        | 2.7           | 2.0            | 1.4           |

**Table S2.** Interaction energies of various cation – anion pairs in kJ/mol, computed with B3LYP/ aug-cc-pvtz

| Interaction energy (kJ/mol) | $\text{Br}^-$ | $\text{DFA}^-$ | $\text{BA}^-$ |
|-----------------------------|---------------|----------------|---------------|
| $\text{OLAm}^+$             | -449          | -502           | -537          |
| $\text{TriBAm}^+$           | -402          | -427           | -459          |
| $\text{DiBAm}^+$            | -438          | -457           | -504          |

**Table S3.** Interaction energies of various cation – anion pairs in kJ/mol, computed with B3LYP/ aug-cc-pvtz with D3(BJ) dispersion corrections.

| Interaction energy (kJ/mol) | Br <sup>-</sup> | DFA <sup>-</sup> | BA <sup>-</sup> |
|-----------------------------|-----------------|------------------|-----------------|
| OLAm <sup>+</sup>           | -459            | -507             | -548            |
| TriBAm <sup>+</sup>         | -426            | -454             | -482            |
| DiBAm <sup>+</sup>          | -449            | -470             | -517            |

**Table S4.** Interaction energies of various cation – anion pairs in kJ/mol, computed with  $\omega$ B97X-D/ aug-cc-pvtz.

| Interaction energy (kJ/mol) | Br <sup>-</sup> | DFA <sup>-</sup> | BA <sup>-</sup> |
|-----------------------------|-----------------|------------------|-----------------|
| OLAm <sup>+</sup>           | -453            | -511             | -547            |
| TriBAm <sup>+</sup>         | -423            | -457             | -485            |
| DiBAm <sup>+</sup>          | -444            | -474             | -518            |

**Table S5.** Interaction energies of various cation – anion pairs in kJ/mol, computed with MP2/ aug-cc-pvtz.

| Interaction energy (kJ/mol) | Br <sup>-</sup> | DFA <sup>-</sup> | BA <sup>-</sup> |
|-----------------------------|-----------------|------------------|-----------------|
| OLAm <sup>+</sup>           | NC <sup>1</sup> | NC               | NC              |
| TriBAm <sup>+</sup>         | -456            | -467             | NC              |
| DiBAm <sup>+</sup>          | -470            | -479             | -522            |

<sup>1</sup> Not Calculated (NC) due to memory cost.

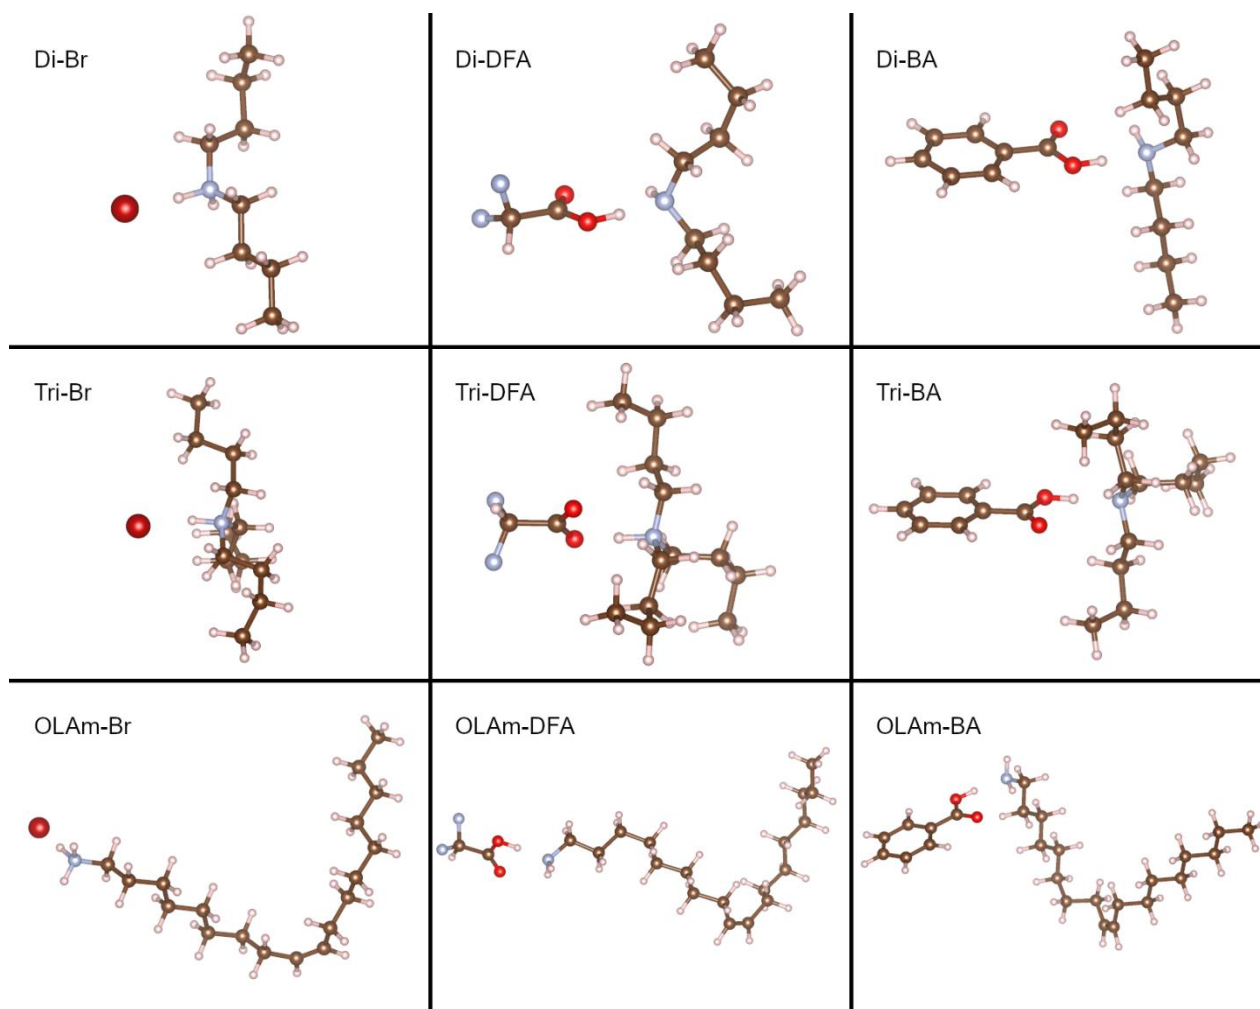

**Figure S2.** Molecular structures for the B3LYP/aug-cc-pvtz optimized cation – anion pairs. Colors are: C (brown), H (white), O (red), N (light blue), Br (maroon).
